# Supplementary material for: Fluorescent sensors reporting the activity of ammonium transceptors in live cells
Source: eLife. 2013 Jul 2;2:e00800. doi: 10.7554/eLife.00800 (PMC3699834; doi:10.7554/eLife.00800)
Supplement: Supplementary file 1. — DOI: http://dx.doi.org/10.7554/eLife.00800.013 [file elife-00800-supp1.xlsx]

## Sheet: Sheet1
Name	Sequence	Notes
EGFP-150-for	aacgtctatatcatggcc
EGFP-239-rev	ttttt accggt accacc cttgtacagctcgtcca	Bold: AgeI sequence
		Underlined: linker sequence
EGFP-1-for	ttttt accggt ggatct atggtgagcaagggcg	Bold: AgeI sequence
		Underlined: linker sequence
EGFP-144-rev	agttgtactccagcttgtgc
cpGFP-for	ttttt tctaga aacgtctatatcatggcc	Bold: XbaI sequence
cpGFP-rev	ttttt tctaga gttgtactccagcttgtgc	Bold: XbaI sequence
mTFP-for	ttttt tctaga atggtgagcaagggcgagg	Bold: XbaI sequence
mTFP-rev	ttttt tctaga cttgtacagctcgtccatg	Bold: XbaI sequence
Venus-for	ttttt tctaga aagggcgaggagctgttca	Bold: XbaI sequence
Venus-rev	ttttt tctaga cttgtacagctcgtccatg	Bold: XbaI sequence
cpGFP-hom-for-SH	ggtcctcgtcgtggtcggttcgagaaa tctcat aacgtctatatcaag	Bold: region homologous to AMT
		Underlined: linker sequence
cpGFP-hom -for-GGSH	ggtcctcgtcgtggtcggttcgagaaa ggtggttctcat aacgtctatatcaag	Bold: region homologous to AMT
		Underlined: linker sequence
cpGFP-hom -for-GGGGSH	ggtcctcgtcgtggtcggttcgagaaa ggtggtggtggttctcat aacgtctatatcaag	Bold: region homologous to AMT
		Underlined: linker sequence
cpGFP-hom -for-LE	ggtcctcgtcgtggtcggttcgagaaa ctcgag aacgtctatatcaag	Bold: region homologous to AMT
		Underlined: linker sequence
cpGFP-hom -for-GGLE	ggtcctcgtcgtggtcggttcgagaaa ggtggtctcgag aacgtctatatcaag	Bold: region homologous to AMT
		Underlined: linker sequence
cpGFP-hom -for-GGGGLE	ggtcctcgtcgtggtcggttcgagaaa ggtggtggtggtctcgag aacgtctatatcaag	Bold: region homologous to AMT
		Underlined: linker sequence
cpGFP-hom -rev	gtggccgcgcagagcaatagcgcgaccacc gttgtactccagcttg	Bold: region homologous to AMT
		Underlined: linker sequence
cpGFP-hom -rev-GG	gtggccgcgcagagcaatagcgcgaccacc tcctcc gttgtactccagcttg	Bold: region homologous to AMT
		Underlined: linker sequence
cpGFP-hom -rev-FN	gtggccgcgcagagcaatagcgcgaccacc attaaa gttgtactccagcttg	Bold: region homologous to AMT
		Underlined: linker sequence
cpGFP-hom -rev-TR	gtggccgcgcagagcaatagcgcgaccacc tcttgt gttgtactccagcttg	Bold: region homologous to AMT
		Underlined: linker sequence
cGFP-hom-for-deg	ggtcctcgtcgtggtcggttcgagaaa NNNNNN aacgtctatatcaag	Bold: region homologous to AMT
		Underlined: linker sequence (N = any nucleotide)
attB1-MEP2-for	ggggacaagtttgtacaaaaaagcaggctta atgtcttacaattttac	Italics: attB1 site
MEP2-217-rev	acgtgtaacagggtcattacgcttaccc
MEP2-218-for	aaagggatgcccaagtacaaaccacattc
attB2-MEP2-rev	ggggaccactttgtacaagaaagctgggtc ttatactatatggtcagtgttc	Italics: attB2 site
cpGFP-LS-MEP2-for	ctgggtaagcgtaatgaccctgttacacgt ttgtct aacgt tatatcaag	Bold: region homologous to MEP2
		Underlined: linker sequence
cpGFP-FN-MEP2-rev	ggaatgtggtttgtacttgggcatcccttt attaaa gttgtactccagcttg	Bold: region homologous to MEP2
		Underlined: linker sequence
attB1-AMT1;2-for	ggggacaagtttgtacaaaaaagcaggctta atggacaccgcaaccaccac	Italics: attB1 site
AMT1;2-242-rev	ccggtcaaatctacctattc
AMT1;2-243-for	tcaggccggtccgtggctttac
attB2-AMT1;2-rev	ggggaccactttgtacaagaaagctgggtc tcaaacagtcaaggtcggtg	Italics: attB2 site
